# Supplementary material for: Self-powered triboelectric wearable biosensor using Scotch tape
Source: Royal Society of Chemistry journal article supplement (doi:10.1039/d3tb01481a), 2023-01-01
Supplement: d3tb01481a3.pdf [file d3tb01481a3.pdf]

## Self-powered Triboelectric Wearable Biosensor Using Scotch Tape

Moon-Hyung Jang<sup>1,2</sup>, Yu Lei<sup>2</sup>, Ryan T. Conners<sup>3</sup>, and Gang Wang<sup>1\*</sup>

<sup>1</sup>*Department of Mechanical and Aerospace Engineering, The University of Alabama in Huntsville, Huntsville, AL 35899, USA*

<sup>2</sup>*Department of Chemical and Materials Engineering, The University of Alabama in Huntsville, Huntsville, AL, 35899 USA*

<sup>3</sup>*Department of Kinesiology, The University of Alabama in Huntsville, Huntsville, AL, 35899 USA*

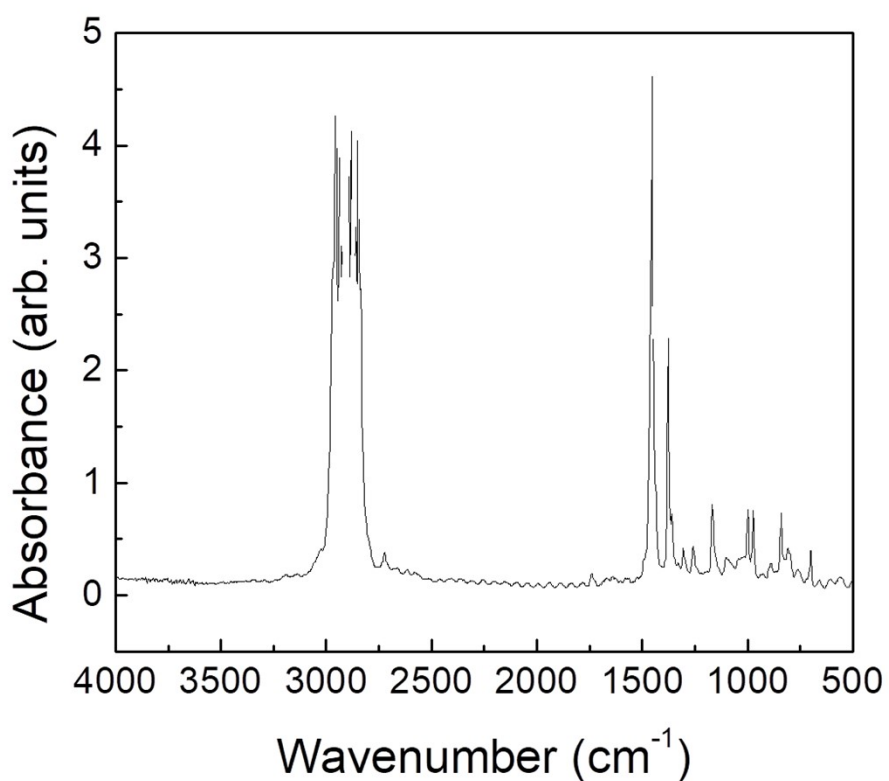

S1. FTIR absorbance spectrum of Scotch shipping tape 3580.

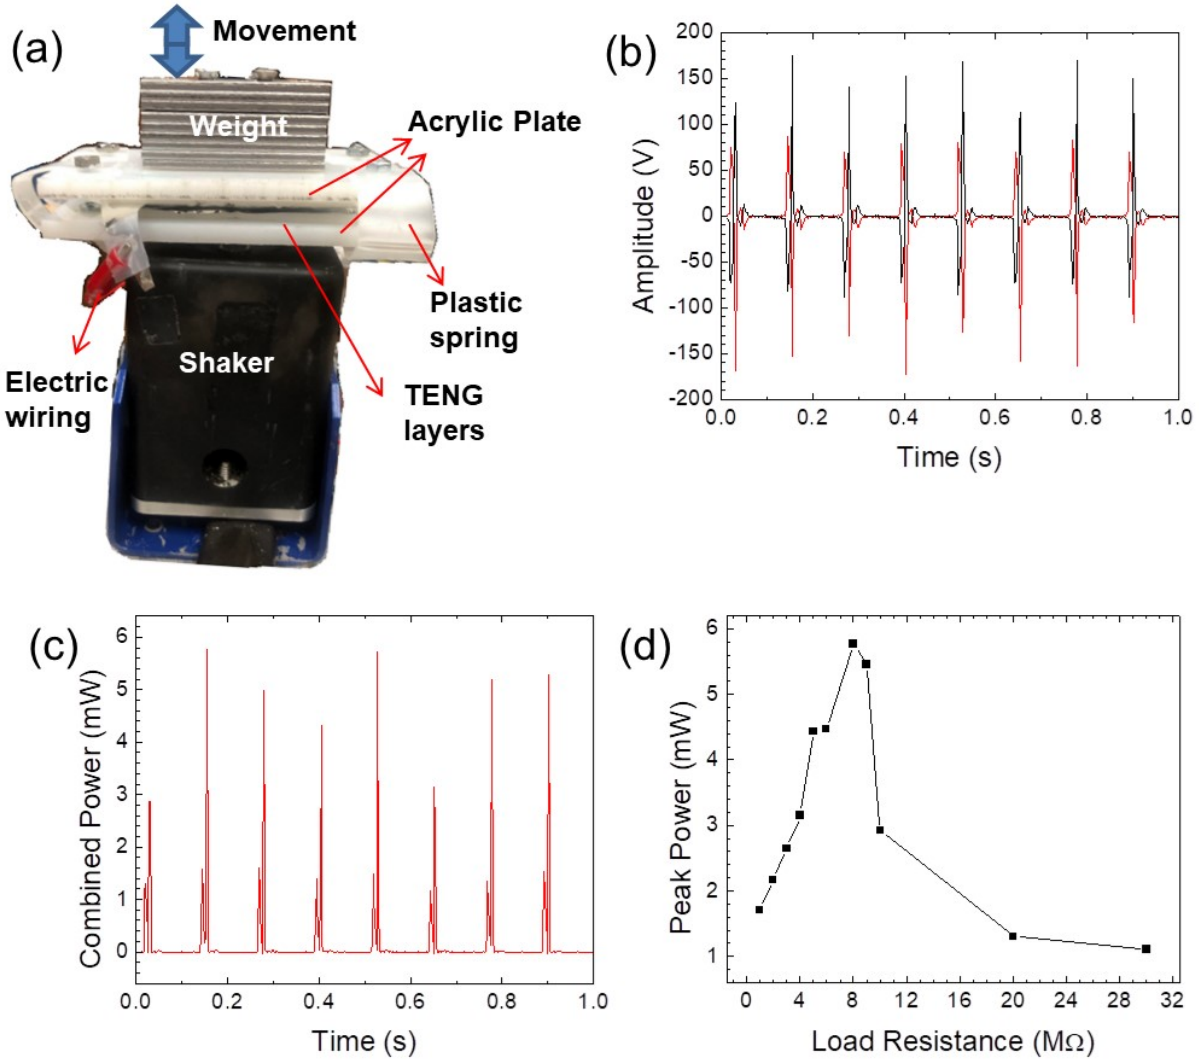

S2. (a) Vibration based energy harvesting test for a TENG with Al/PET/Scotch tape – PET/Al configuration (active area=50 mm x 75 mm), in which the base excitation was 1 G at 8 Hz and the mass was ~0.7 lbs. (b) Voltage amplitudes from Scotch tape side (black) and PET side (red). (c) Combined power from both sides with an electrical load of 8  $M\Omega$ . (d) Peak power values as a function of electrical loads.

S3. Video of collecting voltage amplitude as a function of time from a wearable sensor on the human elbow with flexion and extension movement patterns.

S4. Video of collecting voltage amplitudes as a function of time from a wearable sensor on the human finger with flexion and extension movement patterns.

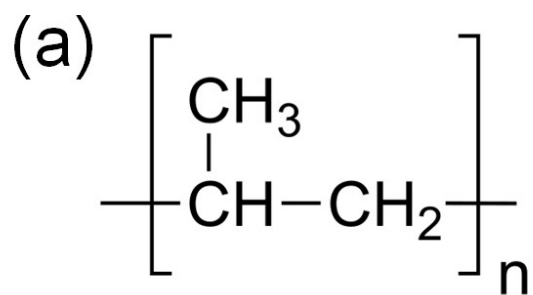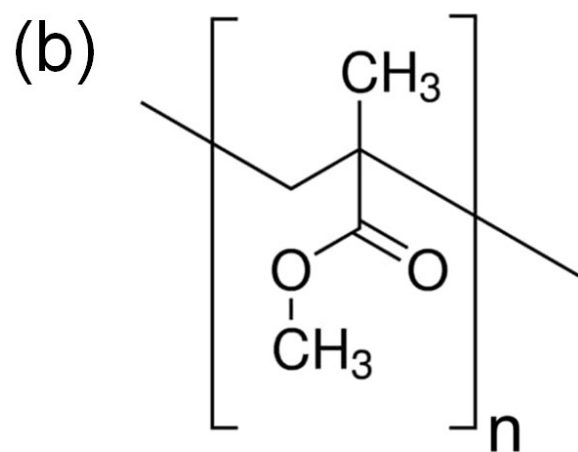

S5. Chemical structures of (a) polypropylene and (b) acrylic.
